# Supplementary material
Source: publisher site journal article supplement (http://www.kjim.org/upload/media/kjim-2022-070-suppl.pdf)
Supplement: Supplementary file 1 [file kjim-2022-070-suppl.pdf]

**Supplementary Table 1. Factors associated with chronic rhinosinusitis in logistic regression analysis**

| Factors                                | Univariable analysis |                | Multivariable analysis   |                |
|----------------------------------------|----------------------|----------------|--------------------------|----------------|
|                                        | OR (95% CI)          | <i>p</i> value | OR (95% CI) <sup>b</sup> | <i>p</i> value |
| Age of bronchiectasis diagnosis        | 0.96 (0.94–0.99)     | 0.002          | 0.96 (0.94–0.99)         | 0.003          |
| Female sex                             | 0.93 (0.57–1.54)     | 0.788          | 0.94 (0.54–1.64)         | 0.816          |
| Body mass index                        | 1.02 (0.95–1.10)     | 0.636          | 1.01 (0.93–1.10)         | 0.811          |
| Idiopathic bronchiectasis <sup>a</sup> | 2.01 (1.22–3.33)     | 0.006          | 1.95 (1.12–3.34)         | 0.018          |
| Asthma                                 | 1.18 (0.65–1.18)     | 0.595          | 1.52 (0.80–2.89)         | 0.200          |
| Exacerbation numbers                   | 0.98 (0.86–1.13)     | 0.807          | 0.99 (0.85–1.15)         | 0.872          |
| FEV1% predicted                        | 1.01 (0.99–1.02)     | 0.286          | 1.01 (0.99–1.02)         | 0.208          |

OR, odds ratio; CI, confidence interval; FEV1%, forced expiratory volume in 1 second %.

<sup>a</sup>Reference was non-idiopathic bronchiectasis.

<sup>b</sup>All variables listed in table were adjusted.
